# Supplementary material for: Management of Helicobacter Pylori Infection and Effectiveness Rates in Daily Clinical Practice in Spain: 2010–2019
Source: MDPI journal article supplement (doi:10.3390/antibiotics11050698), 2022-05-20
Supplement: s1 [file s1]

## Supplementary Materials

**Table S1.** Effectiveness detailed by prescription year in non-allergic to penicillin patients, overall effectiveness and disaggregated by first line therapy.

| Anual effectiveness | TOTAL<br>n=1644  | PCA<br>n=686     | PLA<br>n=123    | PCAM<br>n=737    | PPylera®<br>n=87 | Other<br>n=11 |
|---------------------|------------------|------------------|-----------------|------------------|------------------|---------------|
| 2010 ITT            | 102/161<br>63.4% | 76 /127<br>59.8% | 25 /32<br>78.1% | 1 /1<br>100%     | -                | -             |
| PP                  | 102/157<br>65%   | 76/125<br>60.8%  | 25/31<br>80.6%  | 1/1<br>100%      | -                | -             |
| 2011 ITT            | 156/247<br>63.2% | 124/203<br>61.1% | 31/40<br>77.5%  |                  |                  | 1/4<br>25%    |
| PP                  | 156/239<br>65.3% | 124/198<br>62.6% | 31/38<br>81.6%  | -                | -                | 1/3<br>33.3%  |
| 2013 ITT            | 140/200<br>70%   | 110/160<br>68.8% | 12/20<br>60%    | 18/20<br>90%     |                  |               |
| PP                  | 140/198<br>70.7% | 110/159<br>69.2% | 12/20<br>60%    | 18/19<br>94.7%   | -                | -             |
| 2014 ITT            | 178/264<br>67.4% | 115/177<br>65%   | 5/13<br>38.5%   | 57/73<br>78.1%   |                  | 1/1<br>100%   |
| PP                  | 178/261<br>68.2% | 115/176<br>65.3% | 5/13<br>38.5%   | 57/71<br>80.3%   | -                |               |
| 2015 ITT            | 161/199<br>80.9% | 4/11<br>36.4%    | 6/9<br>66.7%    | 151/178<br>84.8% |                  | 0/1<br>0%     |
| PP                  | 161/190<br>84.7% | 4/11<br>36.4%    | 6/9<br>66.7%    | 151/169<br>89.3% | -                | 0/1<br>0%     |
| 2016 ITT            | 113/158<br>71.5% | 6/7<br>85.7%     | 3/4<br>75%      | 100/141<br>70.9% | 4/4<br>100%      | 0/2<br>0%     |
| PP                  | 113/155<br>72.9% | 6/7<br>85.7%     | 3/4<br>75%      | 100/138<br>72.5% | 4/4<br>100%      | 0/2<br>0%     |
| 2017 ITT            | 145/196<br>74%   | 0/1<br>0%        | 3/5<br>60%      | 125/170<br>73.5% | 15/18<br>83.3%   | 2/2<br>100%   |
| PP                  | 145/193<br>75.1% | -                | 3/5<br>60%      | 125/168<br>74.4% | 15/18<br>83.3%   | 2/2<br>100%   |
| 2018 ITT            | 111/144          | -                | -               | 87/115           | 24/29            | -             |

|          |                  |   |   |                 |                |   |
|----------|------------------|---|---|-----------------|----------------|---|
|          | 77.1%            |   |   | 75.7%           | 82.8%          |   |
| PP       | 111/143<br>77.6% | - | - | 87/114<br>76.3% | 24/29<br>82.8% | - |
| 2019 ITT | 56/75<br>74.7%   | - | - | 28/39<br>71.8%  | 28/36<br>77.8% | - |
| PP       | 56/75<br>74.7%   | - | - | 28/39<br>71.8%  | 28/36<br>77.8% | - |

Expressed as number of successful eradications and percentage: n (%). ITT: Intention To Treat. PCA: classic triple therapy (PPI + Clarithromycin + Amoxicillin). PCAM: concomitant non-bismuth quadruple therapy (PPI + Clarithromycin + Amoxicillin + Metronidazole). PLA: levofloxacin based triple therapy (PPI + Levofloxacin + Amoxicillin). PP: Per Protocol. PPylera®: single capsule bismuth quadruple therapy (PPI + Pylera®). PPI: Proton Pump Inhibitor.

**Table S2.** Effectiveness of first line treatments with PCAM (PPI + Clarithromycin + Amoxicillin + Metronidazole) in non-penicillin-allergic patients: detailed analysis by variables.

| PCAM            | Categories     | ITT          |        |           | PP           |        |           |
|-----------------|----------------|--------------|--------|-----------|--------------|--------|-----------|
|                 |                | N            | %      | 95% CI    | N            | %      | 95% CI    |
| Duration        | 7 days         | 0            | -      | -         | 0            | -      | -         |
|                 | 10 days        | 260          | 78.5%  | 73.1-83.0 | 248          | 82.3%  | 77.0-86.5 |
|                 | 14 days        | 297          | 84.5%  | 80.0-88.2 | 294          | 85.4%  | 80.9-89.0 |
|                 | <i>p-value</i> | 0.065        |        |           | 0.325        |        |           |
| PPI             | Omeprazole     | 68           | 86.8%  | 76.7-92.9 | 67           | 88.1%  | 78.2-93.8 |
|                 | Esomeprazole   | 74           | 89.2%  | 80.1-94.4 | 74           | 89.2%  | 80.1-94.4 |
|                 | Other PPI      | 22           | 81.8%  | 61.5-92.7 | 22           | 81.8%  | 61.5-92.7 |
|                 | <i>p-value</i> | 0.656        |        |           | 0.648        |        |           |
| Sex             | Female         | 451          | 74.9%  | 70.7-78.7 | 440          | 76.8%  | 72.7-80.5 |
|                 | Male           | 286          | 80.1%  | 75.1-84.3 | 279          | 82.1%  | 77.2-86.1 |
|                 | <i>p-value</i> | 0.107        |        |           | 0.092        |        |           |
| Center          | Center 1 (Z)   | 381          | 77.7%  | 73.2-81.6 | 371          | 79.8%  | 75.4-83.6 |
|                 | Center 2 (T)   | 356          | 76.1%  | 71.4-80.3 | 348          | 77.9%  | 73.2-81.9 |
|                 | <i>p-value</i> | 0.614        |        |           | 0.531        |        |           |
| Age             | <55 years      | 435          | 73.8%  | 69.5-77.7 | 421          | 76.2%  | 72.0-80.1 |
|                 | ≥55 years      | 302          | 81.5%  | 76.7-85.4 | 298          | 82.6%  | 77.8-86.4 |
|                 | <i>p-value</i> | <b>0.015</b> |        |           | <b>0.041</b> |        |           |
| Appropriateness | No             | 1            | 100.0% | -         | 1            | 100.0% | -         |
|                 | Yes            | 736          | 76.9%  | 73,7-79,8 | 718          | 78.8%  | 75,7-81,7 |
|                 | <i>p-value</i> | 0.584        |        |           | 0.604        |        |           |
| Total           |                | 737          | 76.9%  | 73.8-79.8 | 719          | 78.9%  | 75.7-81.7 |

PCAM: PPI + Clarithromycin + Amoxicillin + Metronidazole. PPI: Proton Pump Inhibitor. ITT: Intention To Treat. PP: Per Protocol. N: total of patients included. %: proportion of patients presenting effectiveness. 95%CI: Confidence Interval. Center 1 (Z): Lozano Blesa University Hospital, Zaragoza (Spain). Center 2 (T): Obispo Polanco Hospital, Teruel (Spain). Bold values denote statistical significance at the *p-value* < 0.05 level. *p-value*: Chi Square test for proportion difference was applied.

**Table S3.** Effectiveness of first line treatments with PCA (PPI + Clarithromycin + Amoxicillin) in non-penicillin-allergic patients: detailed analysis by variables.

| PCA             | Categories     | ITT   |       |           | PP           |       |           |
|-----------------|----------------|-------|-------|-----------|--------------|-------|-----------|
|                 |                | N     | %     | 95% CI    | N            | %     | 95% CI    |
| Duration        | 7 days         | 62    | 58.1% | 45.7-69.5 | 61           | 59.0% | 46.5-70.5 |
|                 | 10 days        | 248   | 64.9% | 58.8-70.6 | 247          | 65.2% | 59.0-70.8 |
|                 | 14 days        | 31    | 58.1% | 40.8-73.6 | 30           | 60.0% | 42.3-75.4 |
|                 | <i>p-value</i> | 0.506 |       |           | 0.610        |       |           |
| PPI             | Omeprazole     | 199   | 69.8% | 63.1-75.8 | 199          | 69.8% | 63.1-75.8 |
|                 | Esomeprazole   | 16    | 56.3% | 33.2-76.9 | 16           | 56.3% | 33.2-76.9 |
|                 | Other PPI      | 34    | 61.8% | 45.0-76.1 | 34           | 61.8% | 45.0-76.1 |
|                 | <i>p-value</i> | 0.381 |       |           | 0.381        |       |           |
| Sex             | Female         | 399   | 60.7% | 55.8-65.3 | 396          | 61.1% | 56.2-65.8 |
|                 | Male           | 287   | 67.2% | 61.6-72.4 | 280          | 68.9% | 63.3-74.1 |
|                 | <i>p-value</i> | 0.077 |       |           | <b>0.037</b> |       |           |
| Center          | Center 1 (Z)   | 258   | 59.7% | 53.6-65.5 | 250          | 61.6% | 55.4-67.4 |
|                 | Center 2 (T)   | 428   | 65.7% | 61.0-70.0 | 426          | 66.0% | 61.3-70.3 |
|                 | <i>p-value</i> | 0.116 |       |           | 0.253        |       |           |
| Age             | <55 years      | 406   | 63.1% | 58.3-67.6 | 400          | 64.0% | 59.2-68.6 |
|                 | ≥55 years      | 280   | 63.9% | 58.2-69.3 | 276          | 64.9% | 59.1-70.2 |
|                 | <i>p-value</i> | 0.815 |       |           | 0.820        |       |           |
| Appropriateness | No             | 253   | 65.2% | 59.2-70.8 | 251          | 65.7% | 59.7-71.3 |
|                 | Yes            | 433   | 62.4% | 57.7-66.8 | 425          | 63.5% | 58.9-68.0 |
|                 | <i>p-value</i> | 0.453 |       |           | 0.563        |       |           |
| Total           |                | 686   | 63.4% | 59.7-66.9 | 676          | 64.3% | 60.7-67.9 |

PCA: PPI + Clarithromycin + Amoxicillin. PPI: Proton Pump Inhibitor. ITT: Intention To Treat. PP: Per Protocol. N: total of patients included. %: proportion of patients presenting effectiveness. 95%CI: Confidence Interval. Center 1 (Z): Lozano Blesa University Hospital, Zaragoza (Spain). Center 2 (T): Obispo Polanco Hospital, Teruel (Spain). Bold values denote statistical significance at the *p-value* < 0.05 level. *p-value*: Chi Square test for proportion difference was applied.

**Table S4.** Effectiveness of first line treatments with PLA (PPI + Levofloxacin + Amoxicillin) in non-penicillin-allergic patients: detailed analysis by variables.

| PLA             | Categories     | ITT          |        |           | PP           |        |           |
|-----------------|----------------|--------------|--------|-----------|--------------|--------|-----------|
|                 |                | N            | %      | 95% CI    | N            | %      | 95% CI    |
| Duration        | 7 days         | 4            | 50.0%  | 15.0-85.0 | 4            | 50.0%  | 15.0-85.0 |
|                 | 10 days        | 39           | 66.7%  | 51.0-79.4 | 38           | 68.4%  | 52.5-80.9 |
|                 | 14 days        | 1            | 100.0% | -         | 1            | 100.0% | -         |
|                 | <i>p-value</i> | 0.613        |        |           | 0.591        |        |           |
| PPI             | Omeprazole     | 14           | 57.1%  | 32.6-78.6 | 13           | 61.5%  | 35.5-82.3 |
|                 | Esomeprazole   | 7            | 71.4%  | 35.9-91.8 | 7            | 71.4%  | 35.9-91.8 |
|                 | Other PPI      | 5            | 80.0%  | 37.6-96.4 | 5            | 80.0%  | 37.6-96.4 |
|                 | <i>p-value</i> | 0.605        |        |           | 0.734        |        |           |
| Sex             | Female         | 65           | 69.2%  | 57.2-79.1 | 65           | 69.2%  | 57.2-79.1 |
|                 | Male           | 58           | 69.0%  | 56.2-79.4 | 55           | 72.7%  | 59.8-82.7 |
|                 | <i>p-value</i> | 0.975        |        |           | 0.675        |        |           |
| Center          | Center 1 (Z)   | 88           | 68.2%  | 57.9-77.0 | 86           | 69.8%  | 59.4-78.5 |
|                 | Center 2 (T)   | 35           | 71.4%  | 54.9-83.7 | 34           | 73.5%  | 56.9-85.4 |
|                 | <i>p-value</i> | 0.725        |        |           | 0.683        |        |           |
| Age             | <55 years      | 70           | 77.1%  | 66.0-85.4 | 68           | 79.4%  | 68.4-87.3 |
|                 | ≥55 years      | 53           | 58.5%  | 45.1-70.7 | 52           | 59.6%  | 46.1-71.8 |
|                 | <i>p-value</i> | <b>0.027</b> |        |           | <b>0.018</b> |        |           |
| Appropriateness | No             | 123          | 69.1%  | 60.5-76.6 | 120          | 70.8%  | 62.2-78.2 |
|                 | Yes            | 0            | -      | -         | 0            | -      | -         |
|                 | <i>p-value</i> | -            |        |           | -            |        |           |
| Total           |                | 123          | 69.1%  | 60.5-76.6 | 120          | 70.8%  | 62.2-78.2 |

PLA: PPI + Levofloxacin + Amoxicillin. PPI: Proton Pump Inhibitor. ITT: Intention To Treat. PP: Per Protocol. N: total of patients included. %: proportion of patients presenting effectiveness. 95%CI: Confidence Interval. Center 1 (Z): Lozano Blesa University Hospital, Zaragoza (Spain). Center 2 (T): Obispo Polanco Hospital, Teruel (Spain). Bold values denote statistical significance at the *p-value* < 0.05 level. *p-value*: Chi Square test for proportion difference was applied.

**Table S5.** Effectiveness of first line treatments with PPylera®( PPI + Pylera®). in non-penicillin-allergic patients: detailed analysis by variables.

| PPylera®               | Categories          | ITT   |        |            | PP    |        |            |
|------------------------|---------------------|-------|--------|------------|-------|--------|------------|
|                        |                     | N     | %      | 95% CI     | N     | %      | 95% CI     |
| <b>Duration</b>        | <b>7 days</b>       | 0     | -      | -          | 0     | -      | -          |
|                        | <b>10 days</b>      | 64    | 84.4%  | 73.6-91.3  | 64    | 84.4%  | 73.6-91.3  |
|                        | <b>14 days</b>      | 2     | 100.0% | 34.2-100.0 | 2     | 100.0% | 34.2-100.0 |
|                        | <i>p-value</i>      | 0.544 |        |            | 0.544 |        |            |
| <b>PPI</b>             | <b>Omeprazole</b>   | 3     | 100.0% | 43.9-100.0 | 3     | 100.0  | 43.9-100.0 |
|                        | <b>Esomeprazole</b> | 2     | 100.0% | 34.2-100.0 | 2     | 100.0% | 34.2-100.0 |
|                        | <b>Other PPI</b>    | 0     | -      | -          | 0     | -      | -          |
|                        | <i>p-value</i>      | -     |        |            | -     |        |            |
| <b>Sex</b>             | <b>Female</b>       | 48    | 75.0%  | 61.2-85.1  | 48    | 75.0%  | 61.2-85.1  |
|                        | <b>Male</b>         | 39    | 89.7%  | 76.4-95.9  | 39    | 89.7%  | 76.4-95.9  |
|                        | <i>p-value</i>      | 0.078 |        |            | 0.078 |        |            |
| <b>Center</b>          | <b>Center 1 (Z)</b> | 31    | 90.3%  | 75.1-96.7  | 31    | 90.3%  | 75.1-96.7  |
|                        | <b>Center 2 (T)</b> | 56    | 76.8%  | 64.2-85.9  | 56    | 76.8%  | 64.2-85.9  |
|                        | <i>p-value</i>      | 0.119 |        |            | 0.119 |        |            |
| <b>Age</b>             | <b>&lt;55 years</b> | 44    | 86.4%  | 73.3-93.6  | 44    | 86.4%  | 73.3-93.6  |
|                        | <b>≥55 years</b>    | 43    | 76.7%  | 62.3-86.8  | 43    | 76.7%  | 62.3-86.8  |
|                        | <i>p-value</i>      | 0.247 |        |            | 0.247 |        |            |
| <b>Appropriateness</b> | <b>No</b>           | 0     | -      | -          | 0     | -      | -          |
|                        | <b>Yes</b>          | 87    | 81.6%  | 72.2-88.4  | 87    | 81.6%  | 72.2-88.4  |
|                        | <i>p-value</i>      | -     |        |            | -     |        |            |
| <b>Total</b>           |                     | 87    | 81.6%  | 72.2-88.4  | 87    | 81.6%  | 72.2-88.4  |

PPylera®: single capsule bismuth quadruple therapy (PPI + Pylera®). PPI: Proton Pump Inhibitor. ITT: Intention To Treat. PP: Per Protocol. N: total of patients included. %: proportion of patients presenting effectiveness. 95%CI: Confidence Interval. Center 1 (Z): Lozano Blesa University Hospital, Zaragoza (Spain). Center 2 (T): Obispo Polanco Hospital, Teruel (Spain). Bold values denote statistical significance at the *p-value* < 0.05 level. *p-value*: Chi Square test for proportion difference was applied.
